# Supplementary material for: Photorelaxation of imidazole and adenine via electron-driven proton transfer along H2O wires
Source: Royal Society of Chemistry journal article supplement (doi:10.1039/c6fd00131a), 2016-01-01
Supplement: c6fd00131a2.pdf [file c6fd00131a2.pdf]

# Electronic Supplementary Information (ESI) for: Photorelaxation of Imidazole and Adenine via Electron-Driven Proton Transfer Along H<sub>2</sub>O Wires

Rafał Szabla,<sup>\*a</sup> Robert W. Góra,<sup>\*b</sup> Mikołaj Janicki,<sup>b</sup> and Jiří Šponer<sup>a,c</sup>

May 29, 2016

**Table 1** Vertical excitation energies (in eV) of imidazole and adenine in the gas phase and their corresponding clusters with 5 water molecules, computed using the ADC(2)/aug-cc-pVDZ method assuming the ground-state minimum energy structures optimized at the B3LYP/def2-TZVP level. Since only the  $\pi\sigma_{NH}^*$  states were relevant for the EDPT along H<sub>2</sub>O wires mechanism the remaining excited electronic states of  $\pi\sigma^*$  character were omitted in the main manuscript for clarity. These  $\pi\sigma^*$  states had little effect on the overall excited-state dynamics of the isolated imidazole and its water cluster.

| State / Transition                                | $E_{exc}/[eV]$ | $f_{osc}$            | $\lambda/[nm]$ |
|---------------------------------------------------|----------------|----------------------|----------------|
| imidazole (gas phase)                             |                |                      |                |
| S <sub>1</sub> $\pi\sigma_{NH}^*$                 | 5.56           | $7.77 \cdot 10^{-4}$ | 223.0          |
| S <sub>2</sub> $n\sigma_{NH}^*$                   | 6.31           | $1.59 \cdot 10^{-2}$ | 196.4          |
| S <sub>3</sub> $\pi\sigma^*$                      | 6.33           | $3.67 \cdot 10^{-2}$ | 195.8          |
| S <sub>4</sub> $\pi\pi^*$                         | 6.52           | 0.167                | 190.2          |
| S <sub>5</sub> $\pi\sigma^*$                      | 6.58           | $1.63 \cdot 10^{-4}$ | 188.4          |
| imidazole-(H <sub>2</sub> O) <sub>5</sub> cluster |                |                      |                |
| S <sub>1</sub> $\pi\sigma_{NH}^*$                 | 5.50           | $3.55 \cdot 10^{-3}$ | 225.4          |
| S <sub>2</sub> $\pi\sigma^*$                      | 5.89           | $2.47 \cdot 10^{-2}$ | 210.5          |
| S <sub>3</sub> $\pi\pi^*(\pi-3s)$                 | 6.10           | $8.64 \cdot 10^{-2}$ | 203.4          |
| S <sub>4</sub> $\sigma\sigma^*$                   | 6.23           | $1.37 \cdot 10^{-2}$ | 199.0          |
| S <sub>5</sub> $\pi\sigma^*$                      | 6.30           | $9.23 \cdot 10^{-5}$ | 196.8          |
| adenine (gas phase)                               |                |                      |                |
| S <sub>1</sub> $n\pi^*$                           | 5.09           | $2.67 \cdot 10^{-3}$ | 243.7          |
| S <sub>2</sub> $\pi\pi^*$                         | 5.19           | 0.239                | 238.9          |
| S <sub>3</sub> $\pi\pi^*$                         | 5.25           | $6.39 \cdot 10^{-2}$ | 236.1          |
| S <sub>4</sub> $\pi\sigma_{NH}^*$                 | 5.36           | $1.03 \cdot 10^{-2}$ | 231.5          |
| S <sub>5</sub> $\pi\sigma^*$                      | 5.67           | $1.21 \cdot 10^{-3}$ | 218.7          |
| adenine-(H <sub>2</sub> O) <sub>5</sub> cluster   |                |                      |                |
| S <sub>1</sub> $n\pi^*$                           | 5.07           | $7.95 \cdot 10^{-3}$ | 244.4          |
| S <sub>2</sub> $\pi\sigma^*$                      | 5.15           | $8.61 \cdot 10^{-2}$ | 240.7          |
| S <sub>3</sub> $\pi\pi^*$                         | 5.22           | 0.192                | 237.5          |
| S <sub>4</sub> $\pi\pi^*$                         | 5.25           | $3.23 \cdot 10^{-2}$ | 236.2          |
| S <sub>5</sub> $\pi\sigma_{NH}^*$                 | 5.49           | $1.48 \cdot 10^{-3}$ | 226.0          |
